# Supplementary material for: Subversion of GBP-mediated host defense by E3 ligases acquired during Yersinia pestis evolution
Source: PubMed Central journal article supplement (PMC9352726; doi:10.1038/s41467-022-32218-y), 2022-08-04
Supplement: 41467_2022_32218_MOESM1_ESM.pdf [file 41467_2022_32218_MOESM1_ESM.pdf]

## Supplementary Information

### *Yersinia pestis* E3 ligases ubiquitinate and degrade GBPs to antagonize the cell-autonomous defense, an arsenal acquired during evolution

#### Supplementary Figures

|            |   | Percent Identity |       |       |       |       |       |      |      |      |   |             |
|------------|---|------------------|-------|-------|-------|-------|-------|------|------|------|---|-------------|
|            |   | 1                | 2     | 3     | 4     | 5     | 6     | 7    | 8    | 9    |   |             |
| Divergence | 1 | ■                | 38.1  | 35.4  | 34.5  | 34.5  | 32.0  | 35.3 | 30.9 | 33.9 | 1 | SlrP.pro    |
|            | 2 | 96.5             | ■     | 68.3  | 36.8  | 36.7  | 36.1  | 33.5 | 30.9 | 34.4 | 2 | SspH1.pro   |
|            | 3 | 99.3             | 37.8  | ■     | 40.2  | 37.1  | 37.9  | 34.8 | 32.3 | 34.9 | 3 | SspH2.pro   |
|            | 4 | 110.2            | 105.3 | 100.1 | ■     | 69.7  | 70.6  | 36.4 | 30.6 | 35.7 | 4 | lpaH4.5.pro |
|            | 5 | 110.1            | 115.9 | 113.4 | 33.4  | ■     | 74.9  | 36.9 | 27.8 | 36.7 | 5 | lpaH9.8.pro |
|            | 6 | 112.8            | 108.3 | 112.7 | 33.5  | 29.4  | ■     | 35.4 | 26.5 | 35.0 | 6 | lpaH7.8.pro |
|            | 7 | 112.3            | 103.5 | 100.2 | 106.0 | 101.2 | 107.3 | ■    | 70.8 | 83.8 | 7 | YP_3416.pro |
|            | 8 | 121.8            | 100.0 | 102.8 | 103.2 | 100.3 | 110.1 | 35.3 | ■    | 76.6 | 8 | YP_3417.pro |
|            | 9 | 116.1            | 104.3 | 103.4 | 109.3 | 102.2 | 107.1 | 17.7 | 25.6 | ■    | 9 | YP_3418.pro |
|            |   | 1                | 2     | 3     | 4     | 5     | 6     | 7    | 8    | 9    |   |             |

**Supplementary Figure 1. Sequence distances between YspE1/ YspE2 homologs in *Y. pseudotuberculosis*, *Shigella* and *Salmonella* bacteria.**

Protein sequences shown in Fig. 2b were subjected to multiple sequence alignment by ClustalW using Lasergene software MegAlign and each pairwise distances between all the proteins were calculated.

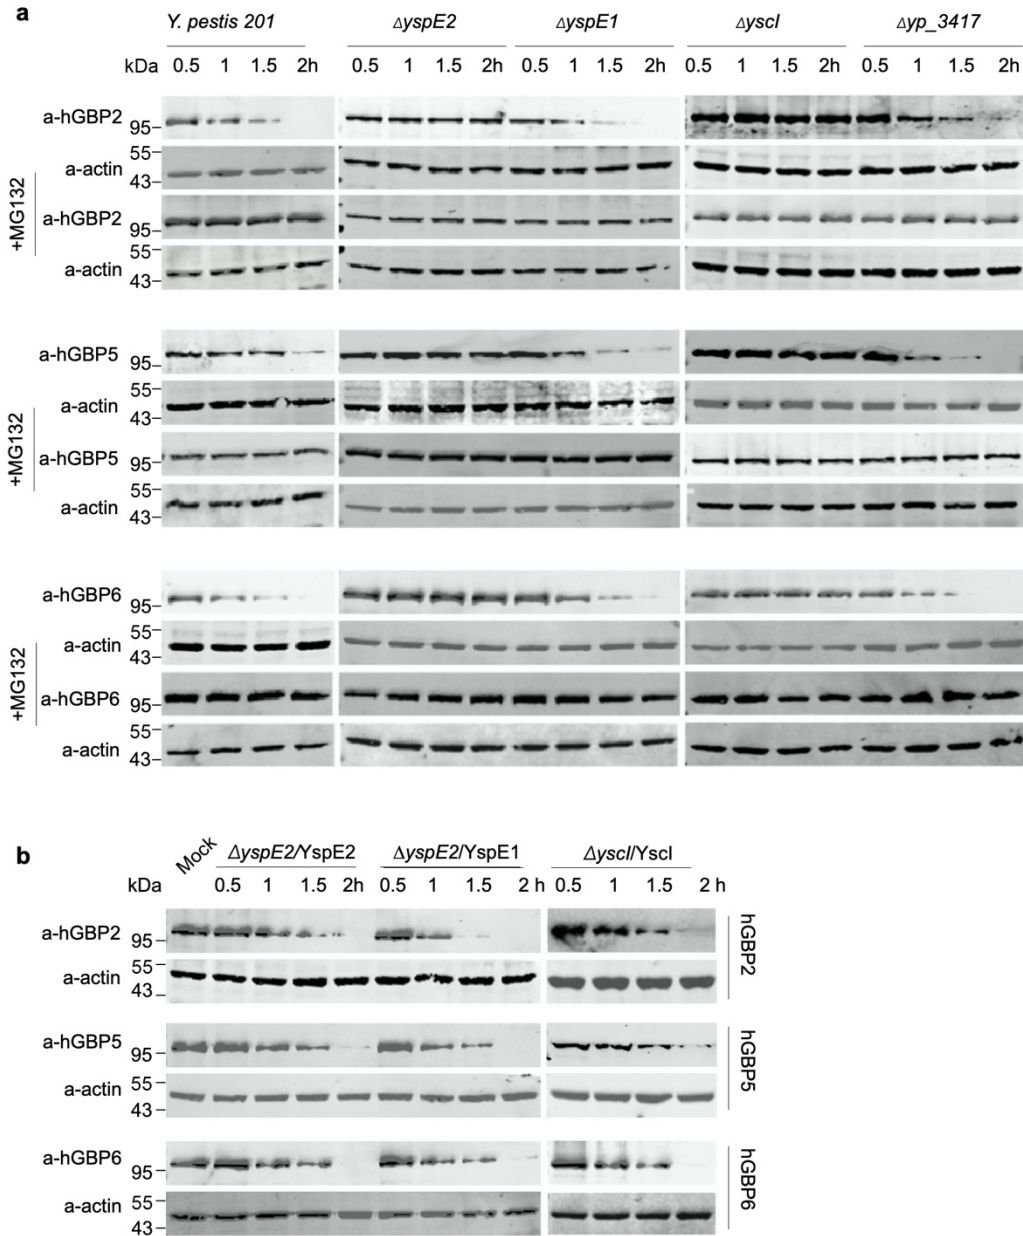

**Supplementary Figure 2. *Y. pestis* infections lead to the proteasome degradation of hGBP 2, 5 and 6.**

(a) HeLa cells stably expressing hGBP 2, 5 and 6 were infected with the wild type *Y. pestis* 201 and various mutants in the presence or absence of MG132 as indicated, and the infected cells were collected at different times and subjected to SDS-PAGE separation and subsequent immunoblotting using specific GBP antibodies. (b) HeLa cells stably expressing hGBP 2, 5 and 6 were infected with  $\Delta yspE2$  complemented with YspE1 or YspE2 expressing plasmid,  $\Delta yscI$  complemented with YscI expressing

plasmid, and the infected cells were analyzed as described in (a). All the experiments have been repeated for three independent times with similar results and only the representative results were shown.

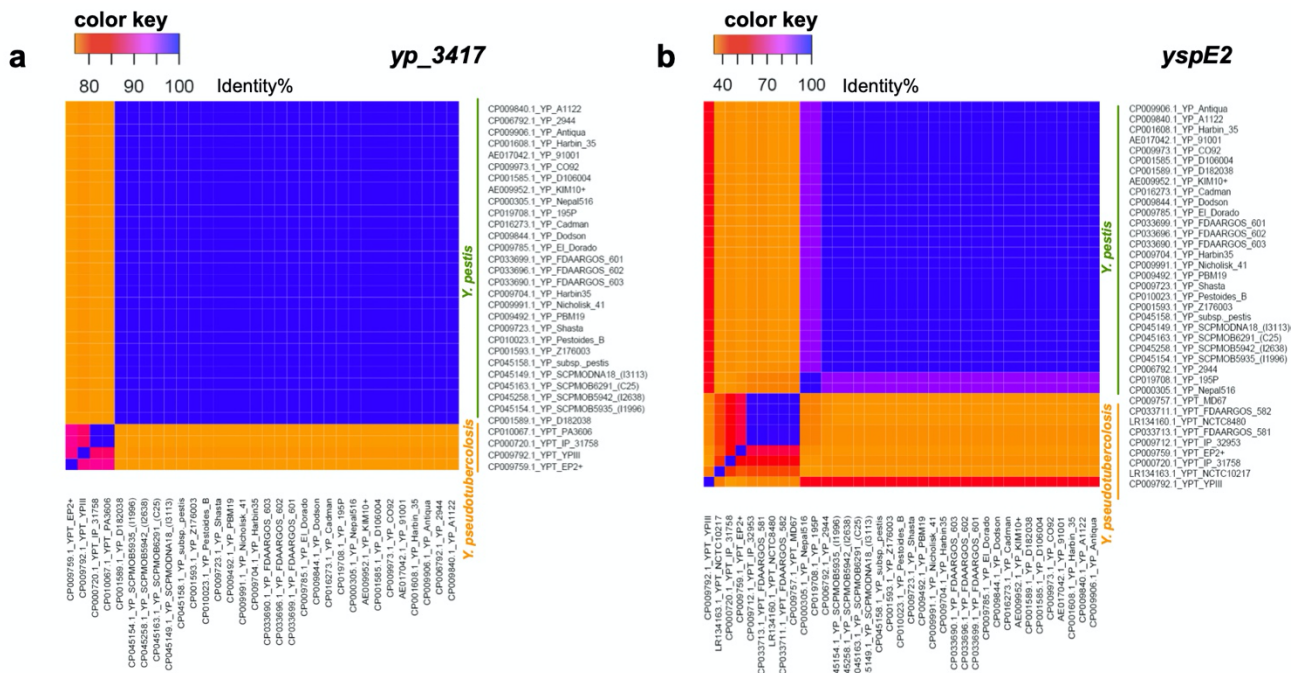

**Supplementary Figure 3. Heatmap of intra- and inter species sequence identity for *yp\_3417* and *yspE2* among *Y. pseudotuberculosis* and *Y. pestis*.**

Heatmap of sequence identity for *yp\_3417* (a) and *yspE2* (b). The identity values are shown in different colors, with a color scale ranging from orange to blue, with purple and red in between.

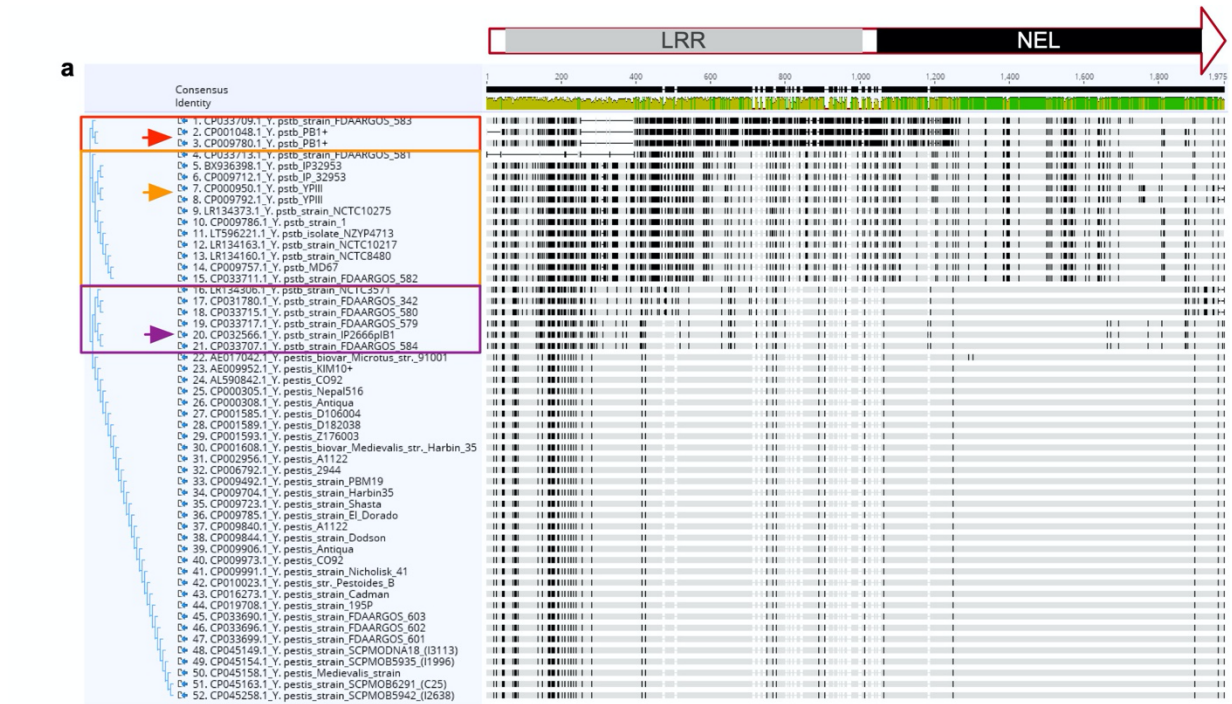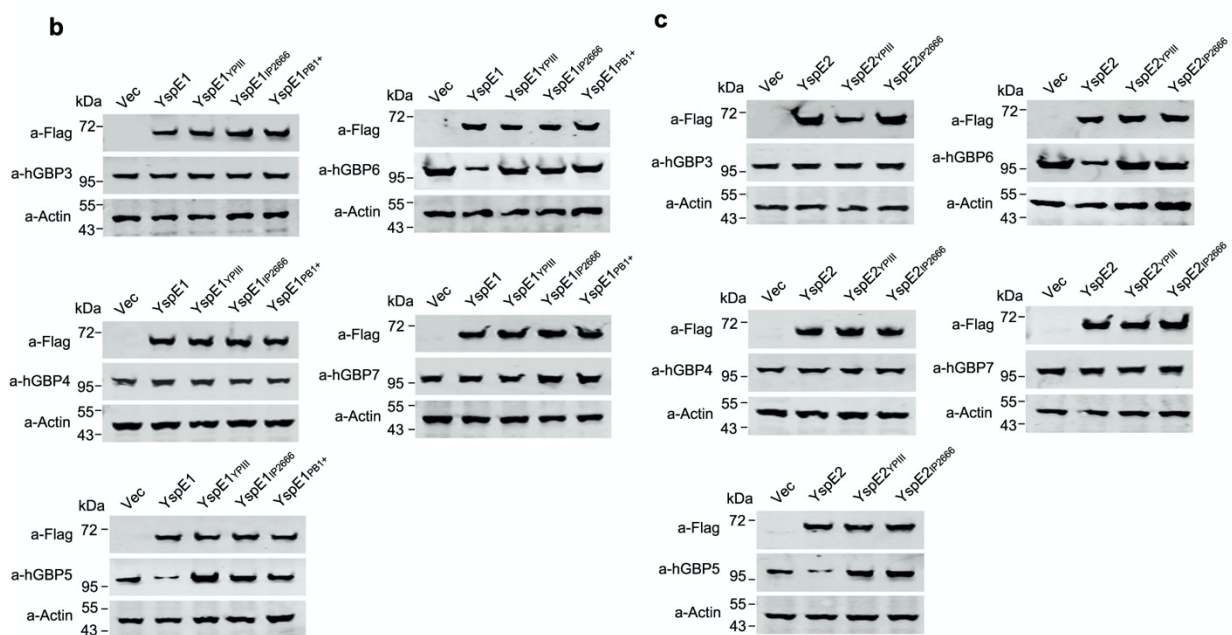

## Supplementary Figure 4. YspE1/YspE2 Homologs in *Y. pseudotuberculosis* Diversify Extensively in Sequence and Cannot Degrade hGBPs.

(a) Sequence alignment analysis of YspE1 homologs in *Y. pseudotuberculosis* and *Y. pestis* strains with complete genomes available in the NCBI database. Arrows indicate IP2666pIB1 (purple), YpIII

(orange) and PB1+ (red) strains that represent the three major clusters of YspE1/YspE2 homologs in *Y. pseudotuberculosis*. GBPs degradation activity of YspE1 (b) and YspE2 (c) homologs in *Y. pseudotuberculosis* IP2666pIB1, YPIII and PB1+. Plasmids expressing FLAG-tagged YspE1/YspE2 homologs in three representative *Y. pseudotuberculosis* were individually transfected into IFN- $\gamma$  treated HeLa cells stably expressing hGBP3-7 as indicated and the transfected cells were lysed and immunoblotted with anti-hGBP antibodies. All the experiments have been repeated for three independent times with similar results and only the representative results were shown.

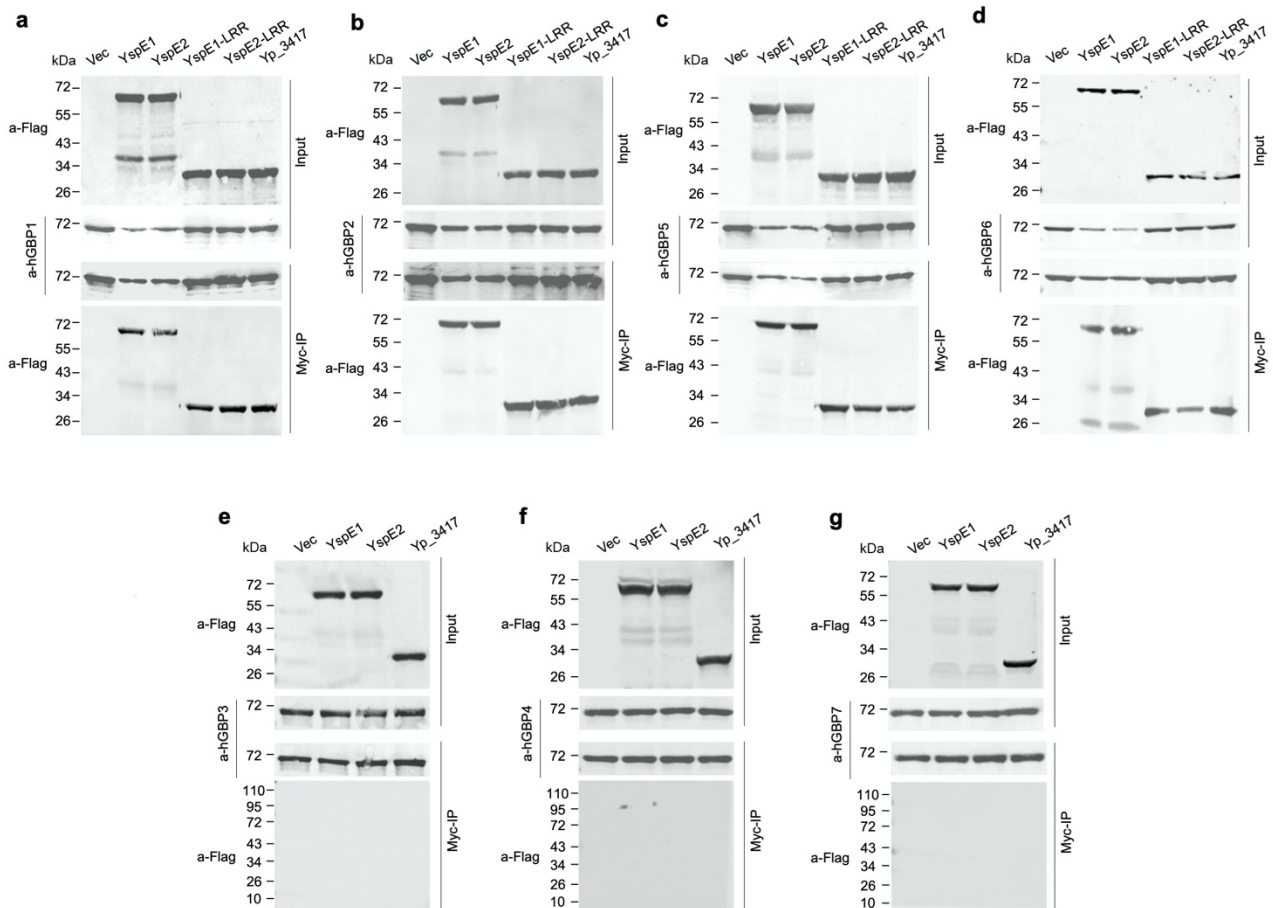

**Supplementary Figure 5. Analysis of interactions between YspE1/YspE2 and the different hGBP by coimmunoprecipitation.**

Plasmids expressing FLAG-tagged YspE1, YspE2 and their LRR domains, as well as YP\_3417, were transiently co-transfected into 293T individually with pCMV-Myc-hGBP1, 2, 5 and 6. Myc-tagged hGBPs were immunoprecipitated with anti-c-Myc beads and the coimmunoprecipitated proteins were measured by immunoblotting analysis using anti-FLAG antibody (a-d). Plasmids expressing FLAG-tagged YspE1, YspE2 and YP\_3417 were transiently co-transfected into 293T individually with pCMV-Myc-hGBP 3,4 and 7 (e-g). Co-immunoprecipitation experiments were performed as described for (a-d). All the experiments have been repeated for three independent times with similar results and only the representative results were shown.

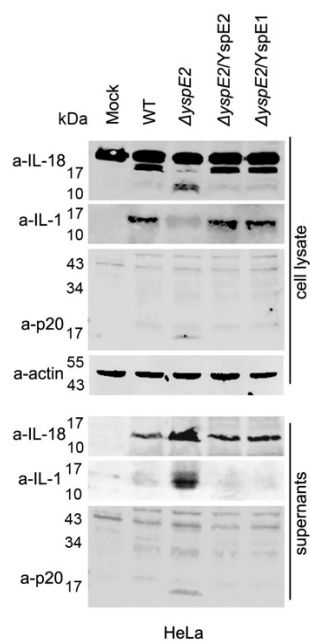

**Supplementary Figure 6. Inhibition of the inflammasome activation in HeLa cells by *Y. pestis* requires YspE1/YspE2 E3 ligase activities.** HeLa cells were infected with *Y. pestis* 201,  $\Delta yspE2$ ,  $\Delta yspE2/YspE1$ ,  $\Delta yspE2/YspE2$  strains as indicated and both the culture medium and cell lysates were analyzed for IL-1 $\beta$ , IL-18 and caspase 1-p20.



## Supplementary Tables

**Supplementary Table 1. Strains and plasmids used in this study.**

| Strains or plasmids                  | Descriptions                                                                                                            | Sources               |
|--------------------------------------|-------------------------------------------------------------------------------------------------------------------------|-----------------------|
| Plasmids                             |                                                                                                                         |                       |
| pDS132                               | Suicide vector pDS132 used for homologous recombination knockout genes                                                  | Laboratory collection |
| pKD46                                | Temperature-sensitive plasmid expressing $\lambda$ Red recombinase under the control of arabinose; Apr                  | Laboratory collection |
| pUC19-Scarlet                        | Vector expressing red fluorescent protein                                                                               | This study            |
| pGEX-4T-2-YspE1                      | <i>yp_3416</i> gene was inserted into pGEX-4T-2; Ap <sup>r</sup>                                                        | This study            |
| pGEX-4T-2-Yp_3417                    | <i>yp_3417</i> gene was inserted into pGEX-4T-2                                                                         | This study            |
| pGEX-4T-2-YspE2                      | <i>yp_3418</i> gene was inserted into pGEX-4T-2                                                                         | This study            |
| pGEX-4T-2-YspE2 <sub>C386A</sub>     | <i>yp_3418</i> gene with Cys-386 to Ala mutation was inserted into pGEX-4T-2                                            | This study            |
| pGEX-4T-2-YspE1 <sub>C407A</sub>     | <i>yp_3416</i> gene with Cys-407 to Ala mutation was inserted into pGEX-4T-2                                            | This study            |
| pGEX-4T-2-YspE1 <sub>LRR</sub>       | <i>yp_3416</i> gene with LRR domain was inserted into pGEX-4T-2                                                         | This study            |
| pGEX-4T-2-YspE2 <sub>LRR</sub>       | <i>yp_3418</i> gene with LRR domain was inserted into pGEX-4T-2                                                         | This study            |
| pCMV-Myc                             | Mammalian expression vector expresses proteins containing the N-terminal c-Myc epitope tag.                             | Addgene               |
| pCMV-Myc-hGBP1                       | <i>hGBP1</i> gene was inserted into pCMV-Myc                                                                            | This study            |
| pCMV-Myc-hGBP2                       | <i>hGBP2</i> gene was inserted into pCMV-Myc                                                                            | This study            |
| pCMV-Myc-hGBP3                       | <i>hGBP3</i> gene was inserted into pCMV-Myc                                                                            | This study            |
| pCMV-Myc-hGBP4                       | <i>hGBP4</i> gene was inserted into pCMV-Myc                                                                            | This study            |
| pCMV-Myc-hGBP5                       | <i>hGBP5</i> gene was inserted into pCMV-Myc                                                                            | This study            |
| pCMV-Myc-hGBP6                       | <i>hGBP6</i> gene was inserted into pCMV-Myc                                                                            | This study            |
| pCMV-Myc-hGBP7                       | <i>hGBP7</i> gene was inserted into pCMV-Myc                                                                            | This study            |
| Psumo                                | Expression vectors 6xHis fusion protein; Kana                                                                           |                       |
| pSUMO-hGBP1                          | <i>hGBP1</i> gene was inserted into pSUMO                                                                               | This study            |
| pSUMO-hGBP4                          | <i>hGBP4</i> gene was inserted into pSUMO                                                                               |                       |
| pACYC184-YspE1                       | <i>yp_3416</i> gene was inserted into pACYC184                                                                          | This study            |
| pACYC184-YspE2                       | <i>yp_3418</i> gene was inserted into pACYC184                                                                          | This study            |
| pACYC184-YspE2 <sub>C386A</sub>      | <i>yp_3418</i> gene with Cys-386 to Ala mutation was inserted into pACYC184                                             | This study            |
| pBAD24                               | Plasmids for expression of the cloned gene under the control of arabinose; Apr                                          |                       |
| pBAD24-Yscl                          | <i>yscI</i> gene was inserted into pBAD24                                                                               |                       |
| pBAD24-YspE1                         | <i>yp_3416</i> gene was inserted into pBAD24; Ap <sup>r</sup>                                                           | This study            |
| pBAD24-Yp_3417                       | <i>yp_3417</i> gene was inserted into pBAD24                                                                            | This study            |
| pBAD24-YspE2                         | <i>yp_3418</i> gene was inserted into pBAD24                                                                            | This study            |
| pBAD24-YspE1 <sub>100</sub> -CyaA    | Amino acid 1-100 coding sequences of <i>yp_3416</i> gene fusion 1-402 base of <i>cyaA</i> gene was inserted into pBAD24 | This study            |
| pBAD24-Yp_3417 <sub>100</sub> -CyaA  | Amino acid 1-100 coding sequences of <i>yp_3417</i> gene fusion 1-402 base of <i>cyaA</i> gene was inserted into pBAD24 | This study            |
| pBAD24-YspE2 <sub>100</sub> -CyaA    | Amino acid 1-100 coding sequences of <i>yp_3418</i> gene fusion 1-402 base of <i>cyaA</i> gene was inserted into pBAD24 | This study            |
| pBAD24-YopM <sub>100</sub> -CyaA     | Amino acid 1-100 coding sequences of <i>yopM</i> gene fusion 1-402 base of <i>cyaA</i> gene was inserted into pBAD24    | This study            |
| pBAD24-CyaA                          | 1-402 base of <i>cyaA</i> gene was inserted into pBAD24                                                                 | This study            |
| p3×Flag-CMV                          | Mammalian expression vector expresses proteins containing the N-terminal 3×Flag epitope tag.                            |                       |
| pBAD24- -E3YPT <sub>IP2666pIB1</sub> | The coding sequences of xx to xx of IP2666pIB1 inserted into pBAD24                                                     | This study            |
| p3×Flag-CMV-YspE1                    | <i>yp_3416</i> gene was inserted into p3×Flag-CMV                                                                       | This study            |
| p3×Flag-CMV-Yp_3417                  | <i>yp_3417</i> gene was inserted into p3×Flag-CMV                                                                       | This study            |
| p3×Flag-CMV-YspE2                    | <i>yp_3418</i> gene was inserted into p3×Flag-CMV                                                                       | This study            |
| p3×Flag-CMV-YspE1 <sub>LRR</sub>     | <i>yp_3416</i> gene with LRR domain was inserted into p3×Flag-CMV                                                       | This study            |

|                                    |                                                                                |            |
|------------------------------------|--------------------------------------------------------------------------------|------------|
| p3×Flag-CMV- YspE2 <sub>LRR</sub>  | <i>yp_3418</i> gene with LRR domain was inserted into p3×Flag-CMV              | This study |
| p3×Flag-CMV-YspE1 <sub>C407A</sub> | <i>yp_3416</i> gene with Cys-407 to Ala mutation was inserted into p3×Flag-CMV | This study |
| p3×Flag-CMV-YspE2 <sub>C386A</sub> | <i>yp_3418</i> gene with Cys-386 to Ala mutation was inserted into p3×Flag-CMV | This study |
| p3×Flag-CMV-Ypk0744                | <i>Ypk0744</i> gene was inserted into p3×Flag-CMV                              | This study |
| p3×Flag-CMV-Ypk0745                | <i>Ypk0745</i> gene was inserted into p3×Flag-CMV                              | This study |
| p3×Flag-CMV-Ypk0746                | <i>Ypk0746</i> gene was inserted into p3×Flag-CMV                              | This study |

## Strains

### *Y. pestis*

|                                                 |                                                                                                  |            |
|-------------------------------------------------|--------------------------------------------------------------------------------------------------|------------|
| 201 strain                                      | Wild-type <i>Y. pestis</i> strain                                                                |            |
| 201 strain-Scarlet                              | 201 strain containing plasmid pUC19-Scarlet                                                      | This study |
| 201-pBAD24-YspE1 <sub>100</sub> -CyaA           | 201 strain containing plasmid pBAD24-Yp_3416 <sub>100</sub> -CyaA                                | This study |
| 201-pBAD24-YspE2 <sub>100</sub> -CyaA           | 201 strain containing plasmid pBAD24-Yp_3418 <sub>100</sub> -CyaA                                | This study |
| 201-pBAD24-YopM <sub>100</sub> -CyaA            | 201 strain containing plasmid pBAD24-YopM <sub>100</sub> -CyaA                                   | This study |
| 201-pBAD24-CyaA                                 | 201 strain containing plasmid pBAD24-CyaA                                                        | This study |
| 201-E3YPT <sub>IP2666pIB1</sub>                 | <i>Δyp_3416-18</i> strain <sup>32</sup> containing plasmid pBAD24- - E3YPT <sub>IP2666pIB1</sub> | This study |
| <i>ΔyscI</i>                                    | <i>yscI</i> gene was replaced by Kanamycin cassette                                              | 35         |
| <i>ΔyspE1</i>                                   | <i>yp_3416</i> gene was eliminated                                                               | This study |
| <i>Δyp_3417</i>                                 | <i>yp_3417</i> gene was replaced by Kanamycin cassette                                           | This study |
| <i>ΔyspE2</i>                                   | <i>yp_3418</i> gene was eliminated                                                               | This study |
| <i>ΔyspE1/YspE1</i>                             | <i>Δyp_3416</i> containing plasmid pACYC184-Yp_3416                                              | This study |
| <i>ΔyspE2/YspE1</i>                             | <i>Δyp_3418</i> containing plasmid pACYC184-Yp_3416                                              | This study |
| <i>ΔyspE2/YspE2</i>                             | <i>Δyp_3418</i> containing plasmid pACYC184-Yp_3418                                              | This study |
| <i>ΔyspE2/YspE1<sub>C386A</sub></i>             | <i>Δyp_3418</i> containing plasmid pACYC184-Yp_3418 <sub>C386A</sub>                             | This study |
| <i>ΔyscI-pBADYscl</i>                           | <i>ΔyscI</i> containing plasmid pBAD24-Yscl                                                      | 35         |
| <i>ΔyspE1-pBAD3416</i>                          | <i>Δyp_3416</i> containing plasmid pBAD24-Yp_3416                                                | This study |
| <i>Δyp_3417-pBAD3417</i>                        | <i>Δyp_3417</i> containing plasmid pBAD24-Yp_3417                                                | This study |
| <i>ΔyspE2-pBAD3418</i>                          | <i>Δyp_3418</i> containing plasmid pBAD24-Yp_3418                                                | This study |
| <i>ΔyspE2-Scarlet</i>                           | <i>Δyp_3418</i> containing plasmid pUC19-Scarlet                                                 | This study |
| <i>ΔyspE2-Yp_3418-Scarlet</i>                   | <i>Δyp_3418-pACYC184-Yp_3418</i> containing plasmid pUC19-Scarlet                                | This study |
| <i>Δyp_3418-Yp_3418<sub>C386A</sub>-Scarlet</i> | <i>Δyp_3418-pACYC184-Yp_3418<sub>C386A</sub></i> containing plasmid pUC19-Scarlet                | This study |

### *Y. pseudotuberculosis*

|        |                                               |                       |
|--------|-----------------------------------------------|-----------------------|
| PA3606 | Wild-type <i>Y. pseudotuberculosis</i> strain | Laboratory collection |
|--------|-----------------------------------------------|-----------------------|

### *E. coli* S17-1λpir

Used to construct a seamless knockout strain of *Y. pestis*

---

**Supplementary Table 2. 38 *Y. pestis* strains with complete genomes available in the NCBI database (sequences were download on Oct 10<sup>th</sup>, 2020) were subjected to multiple sequences alignment analysis in this study.**

| <i>Y. pestis</i> Strains | Accessions | Branch | presence of <i>yp_3416~3418</i> loci |
|--------------------------|------------|--------|--------------------------------------|
| 1412                     | CP006783.1 | 0.PE2  | No                                   |
| 1413                     | CP006762.1 | 0.PE2  | No                                   |
| 1522                     | CP006758.1 | 0.PE2  | No                                   |
| 3067                     | CP006754.1 | 0.PE2  | No                                   |
| 3770                     | CP006751.1 | 0.PE2  | No                                   |
| 8787                     | CP006748.1 | 0.PE2  | No                                   |
| Angola                   | CP009935.1 | 0.PE3a | No                                   |
| Pestoides F              | CP009715.1 | 0.PE2  | No                                   |
| SCPM-O-B-6899 (231)      | CP045145.1 | 0.ANT3 | No                                   |
| Pestoides G              | CP010247.1 | 0.PE2  | No                                   |
| FDAARGOS_602             | CP033696.1 | 0.PE4B | Yes                                  |
| 195/P                    | CP019708.1 | 2.ANT1 | Yes                                  |
| 2944                     | CP006792.1 | 2.MED1 | Yes                                  |
| 91001                    | AE017042.1 | 0.PE4  | Yes                                  |
| A1122                    | CP009840.1 | 1.ORI1 | Yes                                  |
| Antiqua                  | CP009906.1 | 1.ANT  | Yes                                  |
| Cadman                   | CP016273.1 | 1.ORI1 | Yes                                  |
| CO92                     | CP009973.1 | 1.ORI1 | Yes                                  |
| D106004                  | CP001585.1 | 1.IN4  | Yes                                  |
| D182038                  | CP001589.1 | 1.IN3  | Yes                                  |
| Dodson                   | CP009844.1 | 1.ORI1 | Yes                                  |
| El Dorado                | CP009785.1 | 1.ORI1 | Yes                                  |
| FDAARGOS_601             | CP033699.1 | 1.ANT  | Yes                                  |
| FDAARGOS_603             | CP033690.1 | 2.ANT3 | Yes                                  |
| Harbin 35                | CP001608.1 | 2.ANT3 | Yes                                  |
| Harbin35                 | CP009704.1 | 2.ANT3 | Yes                                  |
| KIM10+                   | AE009952.1 | 2.MED1 | Yes                                  |
| Nepal516                 | CP000305.1 | 2.ANT1 | Yes                                  |
| Nicholisk 41             | CP009991.1 | 2.ANT3 | Yes                                  |
| PBM19                    | CP009492.1 | 1.ORI2 | Yes                                  |
| Pestoides B              | CP010023.1 | 0.PE4  | Yes                                  |
| SCPM-O-B-5935 (I-1996)   | CP045154.1 | 2.ANT3 | Yes                                  |
| SCPM-O-B-5942 (I-2638)   | CP045258.1 | 4.ANT1 | Yes                                  |
| SCPM-O-B-6291 (C-25)     | CP045163.1 | 2.MED1 | Yes                                  |
| SCPM-O-B-6530            | CP045158.1 | 2.MED0 | Yes                                  |
| SCPM-O-DNA-18 (I-3113)   | CP045149.1 | 4.ANT1 | Yes                                  |
| Shasta                   | CP009723.1 | 1.ORI1 | Yes                                  |
| Z176003                  | CP001593.1 | 1.IN2  | Yes                                  |

**Supplementary Table 3. 23 *Y. pseudotuberculosis* strains with complete genomes available in the NCBI database (sequences were download on Oct 10th, 2020) were subjected to multiple sequences alignment analysis in this study.**

| <i>Y. pseudotuberculosis</i> Strains  | Accessions |
|---------------------------------------|------------|
| PA3606                                | CP010067.1 |
| FDAARGOS_665                          | CP044064.1 |
| ATCC 6904                             | CP008943.1 |
| IP 31758                              | CP000720.1 |
| EP2/+                                 | CP009759.1 |
| PB1/+                                 | CP009780.1 |
| IP 32953                              | CP009712.1 |
| <i>Y. pseudotuberculosis</i> strain 1 | CP009786.1 |
| NZYP4713                              | LT596221.1 |
| FDAARGOS_580                          | CP033715.1 |
| FDAARGOS_579                          | CP033717.1 |
| FDAARGOS_342                          | CP031780.1 |
| MD67                                  | CP009757.1 |
| IP2666pIB1                            | CP032566.1 |
| FDAARGOS_584                          | CP033707.1 |
| FDAARGOS_583                          | CP033709.1 |
| FDAARGOS_582                          | CP033711.1 |
| FDAARGOS_581                          | CP033713.1 |
| NCTC10217                             | LR134163.1 |
| NCTC8480                              | LR134160.1 |
| NCTC3571                              | LR134306.1 |
| YPIII                                 | CP000950.1 |
| NCTC10275                             | LR134373.1 |
