# Supplementary material for: Subversion of GBP-mediated host defense by E3 ligases acquired during Yersinia pestis evolution
Source: PubMed Central journal article supplement (PMC9352726; doi:10.1038/s41467-022-32218-y), 2022-08-04
Supplement: 41467_2022_32218_MOESM3_ESM.pdf [file 41467_2022_32218_MOESM3_ESM.pdf]

## Description of Additional Supplementary Information

*Supplementary Movies 1-4.*

*Live microscopy analysis of GFP-hGBP1 signals in HeLa cells infected with the various Y. pestis strains. During infection, images were taken every 5 mins until 8 hours of infection using spinning disk system with Nikon ECLIPSE Ti-E microscopy.*

**Title:** Supplementary Movie 1

**Description:** HeLa cells stably expressing hGBP1 were seeded in Lab-Tek chambered cover-glass and infected with the wild type Y. pestis

**Title:** Supplementary Movie 2

**Description:** HeLa cells stably expressing hGBP1 were seeded in Lab-Tek chambered cover-glass and infected with the wild type  $\Delta$ yspE2

**Title:** Supplementary Movie 3

**Description:** HeLa cells stably expressing hGBP1 were seeded in Lab-Tek chambered cover-glass and infected with the wild type  $\Delta$ yspE2/YspE2

**Title:** Supplementary Movie 4

**Description:** HeLa cells stably expressing hGBP1 were seeded in Lab-Tek chambered cover-glass and infected with the wild type  $\Delta$ yspE2/YspE2C386A
