# Supplementary material for: Subversion of GBP-mediated host defense by E3 ligases acquired during Yersinia pestis evolution
Source: PubMed Central journal article supplement (PMC9352726; doi:10.1038/s41467-022-32218-y), 2022-08-04
Supplement: 41467_2022_32218_MOESM8_ESM.pdf [file 41467_2022_32218_MOESM8_ESM.pdf]

## Reporting Summary

Nature Research wishes to improve the reproducibility of the work that we publish. This form provides structure for consistency and transparency in reporting. For further information on Nature Research policies, see our [Editorial Policies](#) and the [Editorial Policy Checklist](#).

### Statistics

For all statistical analyses, confirm that the following items are present in the figure legend, table legend, main text, or Methods section.

n/a Confirmed

- |                                     |                                     |                                                                                                                                                                                                                                                            |
|-------------------------------------|-------------------------------------|------------------------------------------------------------------------------------------------------------------------------------------------------------------------------------------------------------------------------------------------------------|
| <input type="checkbox"/>            | <input checked="" type="checkbox"/> | The exact sample size ( $n$ ) for each experimental group/condition, given as a discrete number and unit of measurement                                                                                                                                    |
| <input checked="" type="checkbox"/> | <input type="checkbox"/>            | A statement on whether measurements were taken from distinct samples or whether the same sample was measured repeatedly                                                                                                                                    |
| <input type="checkbox"/>            | <input checked="" type="checkbox"/> | The statistical test(s) used AND whether they are one- or two-sided<br><i>Only common tests should be described solely by name; describe more complex techniques in the Methods section.</i>                                                               |
| <input checked="" type="checkbox"/> | <input type="checkbox"/>            | A description of all covariates tested                                                                                                                                                                                                                     |
| <input type="checkbox"/>            | <input checked="" type="checkbox"/> | A description of any assumptions or corrections, such as tests of normality and adjustment for multiple comparisons                                                                                                                                        |
| <input type="checkbox"/>            | <input checked="" type="checkbox"/> | A full description of the statistical parameters including central tendency (e.g. means) or other basic estimates (e.g. regression coefficient) AND variation (e.g. standard deviation) or associated estimates of uncertainty (e.g. confidence intervals) |
| <input type="checkbox"/>            | <input checked="" type="checkbox"/> | For null hypothesis testing, the test statistic (e.g. $F$ , $t$ , $r$ ) with confidence intervals, effect sizes, degrees of freedom and $P$ value noted<br><i>Give <math>P</math> values as exact values whenever suitable.</i>                            |
| <input checked="" type="checkbox"/> | <input type="checkbox"/>            | For Bayesian analysis, information on the choice of priors and Markov chain Monte Carlo settings                                                                                                                                                           |
| <input checked="" type="checkbox"/> | <input type="checkbox"/>            | For hierarchical and complex designs, identification of the appropriate level for tests and full reporting of outcomes                                                                                                                                     |
| <input type="checkbox"/>            | <input checked="" type="checkbox"/> | Estimates of effect sizes (e.g. Cohen's $d$ , Pearson's $r$ ), indicating how they were calculated                                                                                                                                                         |

*Our web collection on [statistics for biologists](#) contains articles on many of the points above.*

### Software and code

Policy information about [availability of computer code](#)

Data collection

Confocal images were acquired using an Andor Dragonfly spinning disk confocal microscope. Living images were taken every using spinning disk system with Nikon ECLIPSE Ti-E microscopy. SPR measurements were performed on a Biacore T200 instrument (GE Healthcare).

Data analysis

The software MEGA (v7.0.26) was used to do multiple sequences alignment and compute pairwise distances. Data of real-time monitored SPR assays was analyzed using the Biacore T200 Evaluation Software 2.0. Statistical analysis and survival curves was performed using GraphPad Prism 8.0. Protein sequences shown in Fig. 2B were subjected to multiple sequence alignment using DANSTAR Lasergene V7.1.0. Gene homologs identity between two sequences were displayed using the package of heatmap in R (v3.6.1)

For manuscripts utilizing custom algorithms or software that are central to the research but not yet described in published literature, software must be made available to editors and reviewers. We strongly encourage code deposition in a community repository (e.g. GitHub). See the Nature Research [guidelines for submitting code & software](#) for further information.

## Data

Policy information about [availability of data](#)

All manuscripts must include a [data availability statement](#). This statement should provide the following information, where applicable:

- Accession codes, unique identifiers, or web links for publicly available datasets
- A list of figures that have associated raw data
- A description of any restrictions on data availability

All data generated or analyzed during this study are included in this published article and supplementary information files. Source data are provided with this paper. Sequences of *Y. pestis* and *Y. pseudotuberculosis* strains used in this study were download from NCBI database (<https://www.ncbi.nlm.nih.gov/assembly>).

## Field-specific reporting

Please select the one below that is the best fit for your research. If you are not sure, read the appropriate sections before making your selection.

- Life sciences       Behavioural & social sciences       Ecological, evolutionary & environmental sciences

For a reference copy of the document with all sections, see [nature.com/documents/nr-reporting-summary-flat.pdf](https://www.nature.com/documents/nr-reporting-summary-flat.pdf)

## Life sciences study design

All studies must disclose on these points even when the disclosure is negative.

|                 |                                                                                                                                                                                                                                                                                                                                                                                                                                                                                                                                                                                                        |
|-----------------|--------------------------------------------------------------------------------------------------------------------------------------------------------------------------------------------------------------------------------------------------------------------------------------------------------------------------------------------------------------------------------------------------------------------------------------------------------------------------------------------------------------------------------------------------------------------------------------------------------|
| Sample size     | No statistical methods were used to predetermine sample size. For animal experiments, groups (n=10) of female mice were challenged with bacteria suspensions for both the survive curve experiments and the bacterial burden analysis. Both previously published works and our studies showed that 10 mice per group were sufficient to overcome the effects of individual variations and get reproducible results. For other experiments that involves cell lines or BMDMs, a minimum of three technical replicates were used per sample, and experiments were repeated multiple times independently. |
| Data exclusions | No technical replicates were excluded from the analysis.                                                                                                                                                                                                                                                                                                                                                                                                                                                                                                                                               |
| Replication     | All the experiments have been repeated at least three times, except that the bacterial loads in mice were repeated for two independent times and a representative result was presented in this study.                                                                                                                                                                                                                                                                                                                                                                                                  |
| Randomization   | All the experiments used the common cells for different groups. For animal experiments, all the female mice at 6-8 weeks were randomly grouped.                                                                                                                                                                                                                                                                                                                                                                                                                                                        |
| Blinding        | All the data were collected by equipments automatically and analyzed quantitatively according to a common criteria across all samples..                                                                                                                                                                                                                                                                                                                                                                                                                                                                |

## Reporting for specific materials, systems and methods

We require information from authors about some types of materials, experimental systems and methods used in many studies. Here, indicate whether each material, system or method listed is relevant to your study. If you are not sure if a list item applies to your research, read the appropriate section before selecting a response.

### Materials & experimental systems

| n/a                                 | Involved in the study                                           |
|-------------------------------------|-----------------------------------------------------------------|
| <input type="checkbox"/>            | <input checked="" type="checkbox"/> Antibodies                  |
| <input type="checkbox"/>            | <input checked="" type="checkbox"/> Eukaryotic cell lines       |
| <input checked="" type="checkbox"/> | <input type="checkbox"/> Palaeontology and archaeology          |
| <input type="checkbox"/>            | <input checked="" type="checkbox"/> Animals and other organisms |
| <input checked="" type="checkbox"/> | <input type="checkbox"/> Human research participants            |
| <input checked="" type="checkbox"/> | <input type="checkbox"/> Clinical data                          |
| <input checked="" type="checkbox"/> | <input type="checkbox"/> Dual use research of concern           |

### Methods

| n/a                                 | Involved in the study                           |
|-------------------------------------|-------------------------------------------------|
| <input checked="" type="checkbox"/> | <input type="checkbox"/> ChIP-seq               |
| <input checked="" type="checkbox"/> | <input type="checkbox"/> Flow cytometry         |
| <input checked="" type="checkbox"/> | <input type="checkbox"/> MRI-based neuroimaging |

## Antibodies

Antibodies used

Antibody (catalog number): manufacturer, dilution(s)  
 -Caspase-1 p20 (#PA5-94989): Thermo Fisher Scientific (Waltham, MA, USA), 1:1000 WB  
 -IL-18 (#PA5-79479) and IL-1 $\beta$  (#701304) antibodies: Thermo Fisher Scientific (Waltham, MA, USA), 1:1000 WB  
 -Ubiquitin linkage-specific K48 (ab140601) and Ubiquitin linkage-specific K63 (ab179434) antibodies: Abcam (Cambridge, UK), 1:2000 WB  
 -hGBP1 (ab121039), hGBP2 (ab203238), hGBP3 (ab74061), hGBP4 (ab173697), hGBP5 (ab130569), hGBP6 (ab125704), hGBP7 (ab104293) antibodies: Abcam (Cambridge, UK), 1:2000 WB

- $\beta$ -actin (RM2001), c-Myc-Tag (KM8003), Flag-Tag (KM8002) antibodies: Sungene Biotech (Tianjin, China), 1:5000 WB  
 -Ubiquitin (A-100): Boston Biochem (Cambridge, MA, USA), 1:2000 WB  
 -GFP-Tag (314487): Abmart (Shanghai, China), 1:5000 WB  
 -IRDye 800CW-conjugated goat anti-rabbit antibody (C90529-19) and IRDye 800CW-conjugated goat anti-mouse antibody (C81106-03): LI-COR Biosciences (Lincoln, NE, USA), 1:10000 WB  
 -YP\_3416, YP\_3418 and YopM antibodies were rabbit polyclonal antibodies prepared by our laboratory, 1:200 WB  
 WB - western blot

## Validation

All the antibodies used in this study have been validated by showing acceptable signals in immunoblotting analysis in the corresponding positive samples and no obvious unspecific bands interfering the results.  
 Antibody (catalog number): validation  
 -Caspase-1 p20 (#PA5-94989): WB & IF  
 -IL-18 (#PA5-79479) and IL-1 $\beta$  (#701304): WB & IF  
 -Ubiquitin linkage-specific K48 (ab140601) and Ubiquitin linkage-specific K63 (ab179434): WB & IF  
 -hGBP1 (ab121039), hGBP2 (ab203238), hGBP3 (ab74061), hGBP4 (ab173697), hGBP5 (ab130569), hGBP6 (ab125704), hGBP7 (ab104293): WB  
 - $\beta$ -actin (RM2001), c-Myc-Tag (KM8003) and Flag-Tag (KM8002): WB & IF  
 -Ubiquitin (A-100): WB  
 -GFP-Tag (314487): WB  
 -IRDye 800CW-conjugated goat anti-rabbit antibody (C90529-19) and IRDye 800CW-conjugated goat anti-mouse antibody (C81106-03): WB  
 -YP\_3416, YP\_3418 and YopM: WB  
 WB - western blot, IF - immunofluorescence

## Eukaryotic cell lines

Policy information about [cell lines](#)

|                                                                   |                                                                                                                                                                                                                                                                                                                            |
|-------------------------------------------------------------------|----------------------------------------------------------------------------------------------------------------------------------------------------------------------------------------------------------------------------------------------------------------------------------------------------------------------------|
| Cell line source(s)                                               | HeLa cells stably expressing hGBP1~7 were obtained from Dr Feng Shao's lab (National Institute of Biological Sciences, Beijing, China)<br>HeLa, RAW264.7, 293T and U937 cells used in this study were obtained from the American Type Culture Collection (ATCC).                                                           |
| Authentication                                                    | HeLa cell lines stably expressing hGBP1-7 have been described in a previously published paper (Li, P., et al. Ubiquitination and degradation of GBPs by a Shigella effector to suppress host defence. Nature 551, 378-383).<br>All the cells used were checked by their morphological features but have not authenticated. |
| Mycoplasma contamination                                          | Cell lines were tested negative for mycoplasma.                                                                                                                                                                                                                                                                            |
| Commonly misidentified lines (See <a href="#">ICLAC</a> register) | No commonly misidentified cell line was used.                                                                                                                                                                                                                                                                              |

## Animals and other organisms

Policy information about [studies involving animals](#); [ARRIVE guidelines](#) recommended for reporting animal research

|                         |                                                                                                                                                                                                                                                                                                          |
|-------------------------|----------------------------------------------------------------------------------------------------------------------------------------------------------------------------------------------------------------------------------------------------------------------------------------------------------|
| Laboratory animals      | Female C57 BL/6J mice at 6-8 weeks (wild-type or Gbpchr3 <sup>-/-</sup> , chr5 <sup>-/-</sup> ) were used in this study. Wild-type mice were obtained from Vitalriver Company (Beijing, China) and Gbpchr3 <sup>-/-</sup> , chr5 <sup>-/-</sup> mice were generated in-house as reported in the Methods. |
| Wild animals            | The study did not involve wild animals.                                                                                                                                                                                                                                                                  |
| Field-collected samples | The study did not involve samples collected from the field.                                                                                                                                                                                                                                              |
| Ethics oversight        | Animals were handled in strict accordance to the Guidelines for the Welfare and Ethics of Laboratory Animals of China and all the animal experiments were approved by the Institutional Animal Care Committee of Beijing Institute of Epidemiology and Microbiology (protocol IACUC-DWZX-2020-062)       |

Note that full information on the approval of the study protocol must also be provided in the manuscript.
